# Supplementary material
Source: Springer Nature journal article supplement (https://www.springermedizin.de/resource/supplementary/13012_2011_509_MOESM1_ESM.pdf/9630074)
Supplement: MOESM1 [file 9630074]

# **Smoking cessation and pregnant women: what are your views?**

## **Questionnaire**

**Private and Confidential**

This questionnaire is for midwives in the North East and is about the work you do with pregnant women who smoke tobacco. The results of the questionnaire will be used in a workshop in March 2011 to which you will be invited. The workshop is being planned by a group which includes two midwives and will aim to identify the best ways to help midwives increase the number of pregnant women who do not smoke when they are pregnant.

There are no right or wrong answers. We are only interested in your views. The questionnaire is both anonymous and confidential. There is no personal identifiable information on the questionnaire and the results will be summarised anonymously from all respondents. It is important we have the views of as many midwives as possible in order that we gain a complete picture. You have received this via your manager, so the research team do not have any personal information about you. You should send this questionnaire directly back to the research team so your manager will not know who has responded and will not see any of the completed questionnaires.

If you have any questions before completing the survey, please contact Jane Beenstock, Specialty Registrar in Public Health (j.beenstock@nhs.net) who is one of the researchers working on this project.

This study has been reviewed by the Sunderland Research Ethics Proportionate Review Sub-Committee.

Completion of this questionnaire is voluntary. It will not be possible to identify you from the survey results. If you complete it we will assume that you consent for the information you provide to be summarised with the other respondents and used to inform the workshop in March 2011. We also hope that the outcome of this work is suitable for publication in peer reviewed and professional journals.

### **Instructions**

Questions answered by placing a tick  in one of the boxes. For example:

Are you a midwife?      Yes                       No

If you find a question too difficult to answer or if you do not wish to answer it, please leave it out and move on to the next question.

**To what extent do you agree with these statements? Please tick one option for each statement**

|                                                                                                              | <b>Strongly agree</b>    | <b>Agree</b>             | <b>Neither agree or disagree</b> | <b>Disagree</b>          | <b>Strongly disagree</b> |
|--------------------------------------------------------------------------------------------------------------|--------------------------|--------------------------|----------------------------------|--------------------------|--------------------------|
| I am aware of the NICE guidance published last year about smoking cessation and pregnant women.              | <input type="checkbox"/> | <input type="checkbox"/> | <input type="checkbox"/>         | <input type="checkbox"/> | <input type="checkbox"/> |
| I am actively implementing the NICE guidance published last year about smoking cessation and pregnant women. | <input type="checkbox"/> | <input type="checkbox"/> | <input type="checkbox"/>         | <input type="checkbox"/> | <input type="checkbox"/> |
| Interventions to stop women smoking when they are pregnant are not very effective.                           | <input type="checkbox"/> | <input type="checkbox"/> | <input type="checkbox"/>         | <input type="checkbox"/> | <input type="checkbox"/> |
| I usually recommend women cut down rather than quit.~                                                        | <input type="checkbox"/> | <input type="checkbox"/> | <input type="checkbox"/>         | <input type="checkbox"/> | <input type="checkbox"/> |
| I am confident offering brief advice about smoking cessation to pregnant women.                              | <input type="checkbox"/> | <input type="checkbox"/> | <input type="checkbox"/>         | <input type="checkbox"/> | <input type="checkbox"/> |
| I am confident offering a brief intervention about smoking cessation to pregnant women.                      | <input type="checkbox"/> | <input type="checkbox"/> | <input type="checkbox"/>         | <input type="checkbox"/> | <input type="checkbox"/> |
| I am confident in referring pregnant women to the specialist smoking cessation service.                      | <input type="checkbox"/> | <input type="checkbox"/> | <input type="checkbox"/>         | <input type="checkbox"/> | <input type="checkbox"/> |
| I think it is appropriate for me to follow the NICE recommendations.                                         | <input type="checkbox"/> | <input type="checkbox"/> | <input type="checkbox"/>         | <input type="checkbox"/> | <input type="checkbox"/> |

|                                                                                         | <b>Strongly agree</b>    | <b>Agree</b>             | <b>Neither agree or disagree</b> | <b>Disagree</b>          | <b>Strongly disagree</b> |
|-----------------------------------------------------------------------------------------|--------------------------|--------------------------|----------------------------------|--------------------------|--------------------------|
| Following the NICE recommendations could create a problem for my professional autonomy. | <input type="checkbox"/> | <input type="checkbox"/> | <input type="checkbox"/>         | <input type="checkbox"/> | <input type="checkbox"/> |
| Delivering brief advice about stopping smoking is easy to do.                           | <input type="checkbox"/> | <input type="checkbox"/> | <input type="checkbox"/>         | <input type="checkbox"/> | <input type="checkbox"/> |
| Delivering a brief intervention about stopping smoking is easy to do.                   | <input type="checkbox"/> | <input type="checkbox"/> | <input type="checkbox"/>         | <input type="checkbox"/> | <input type="checkbox"/> |
| It is important to always<br>about smoking behavior.                                    | <input type="checkbox"/> | <input type="checkbox"/> | <input type="checkbox"/>         | <input type="checkbox"/> | <input type="checkbox"/> |
| My attempts to discuss stopping smoking are usually perceived as nagging by women.      | <input type="checkbox"/> | <input type="checkbox"/> | <input type="checkbox"/>         | <input type="checkbox"/> | <input type="checkbox"/> |
| The evidence about the benefits of stopping smoking in pregnancy is very strong.        | <input type="checkbox"/> | <input type="checkbox"/> | <input type="checkbox"/>         | <input type="checkbox"/> | <input type="checkbox"/> |
| I want to help women stop smoking when they are pregnant.                               | <input type="checkbox"/> | <input type="checkbox"/> | <input type="checkbox"/>         | <input type="checkbox"/> | <input type="checkbox"/> |
| I usually discuss how to stop smoking with women who smoke.                             | <input type="checkbox"/> | <input type="checkbox"/> | <input type="checkbox"/>         | <input type="checkbox"/> | <input type="checkbox"/> |
| I usually ask all pregnant women to use the CO monitor.                                 | <input type="checkbox"/> | <input type="checkbox"/> | <input type="checkbox"/>         | <input type="checkbox"/> | <input type="checkbox"/> |

|                                                                                                 | Strongly agree           | Agree                    | Neither agree or disagree | Disagree                 | Strongly disagree        |
|-------------------------------------------------------------------------------------------------|--------------------------|--------------------------|---------------------------|--------------------------|--------------------------|
| Suggesting a women stops smoking when she is pregnant will jeopardise my relationship with her. | <input type="checkbox"/> | <input type="checkbox"/> | <input type="checkbox"/>  | <input type="checkbox"/> | <input type="checkbox"/> |
| I have a clear plan of action when I encounter pregnant women who smoke.                        | <input type="checkbox"/> | <input type="checkbox"/> | <input type="checkbox"/>  | <input type="checkbox"/> | <input type="checkbox"/> |
| I have insufficient time to address smoking cessation with women.                               | <input type="checkbox"/> | <input type="checkbox"/> | <input type="checkbox"/>  | <input type="checkbox"/> | <input type="checkbox"/> |
| I have insufficient resources to address smoking cessation with women.                          | <input type="checkbox"/> | <input type="checkbox"/> | <input type="checkbox"/>  | <input type="checkbox"/> | <input type="checkbox"/> |
| Most midwives don't address smoking cessation with pregnant women                               | <input type="checkbox"/> | <input type="checkbox"/> | <input type="checkbox"/>  | <input type="checkbox"/> | <input type="checkbox"/> |
| Most consultants don't address smoking cessation with pregnant women                            | <input type="checkbox"/> | <input type="checkbox"/> | <input type="checkbox"/>  | <input type="checkbox"/> | <input type="checkbox"/> |
| Most GPs don't address smoking cessation with pregnant women                                    | <input type="checkbox"/> | <input type="checkbox"/> | <input type="checkbox"/>  | <input type="checkbox"/> | <input type="checkbox"/> |

**Finally, some general information about you.....**

**Question 1:** How many years have you practiced as a midwife?

- Less than 2 years
- 3 to 5 years
- 5 to 10 years
- More than 10 years

**Question 2:** How old are you?

24 or less

25 – 29

30 - 34

35 - 39

40 - 44

45 - 49

50 - 54

55 - 59

60 or over

**Question 3:** Are you a current smoker?

Yes

No

Have you ever smoked?

Yes

No

If yes, when did you last smoke?;

In the last year

2 to 5 years ago

6 to 10 years ago

More than 10 years ago

**Question 4:** Which Trust do you work in?

- City Hospitals Sunderland NHS Foundation Trust
- County Durham and Darlington NHS Foundation Trust
- Gateshead Health NHS Foundation Trust
- Newcastle Hospitals NHS Foundation Trust
- North Tees and Hartlepool NHS Foundation Trust
- Northumbria Healthcare NHS Foundation Trust
- South Tees Hospitals NHS Foundation Trust
- South Tyneside NHS Foundation Trust

If you have any comments or thoughts on how midwives can best manage the problem of smoking in pregnancy, please write them below.

---

---

---

---

---

---

---

---

---

This is the end of the questionnaire, thank you very much for taking part. Please return it in the pre-paid envelope provided. If you have any further questions please email Jane Beenstock, [j.beenstock@nhs.net](mailto:j.beenstock@nhs.net).

**Thank you!**
